# Supplementary material for: Four rare structurally characterized hetero-pentanuclear [Zn4Ln] bis(salamo)-type complexes: syntheses, crystal structures and spectroscopic properties
Source: Royal Society of Chemistry journal article supplement (doi:10.1039/c9ra07423f), 2019-01-01
Supplement: c9ra07423f1.pdf [file c9ra07423f1.pdf]

## Supporting information

### Four rare structurally characterized hetero-pentanuclear [Zn<sub>4</sub>Ln] bis(salamo)-type complexes: Syntheses, crystal structures and spectroscopic properties

Lu-Mei Pu<sup>a,\*</sup>, Lan Wang<sup>b</sup>, Xiao-Yan Li<sup>b</sup>, Yin-Xia Sun<sup>b</sup>, Quan-Peng Kang<sup>b</sup>, Hai-Tao Long<sup>a</sup>, Wei-Bing Xu<sup>a</sup> and Wen-Kui Dong<sup>\*</sup>

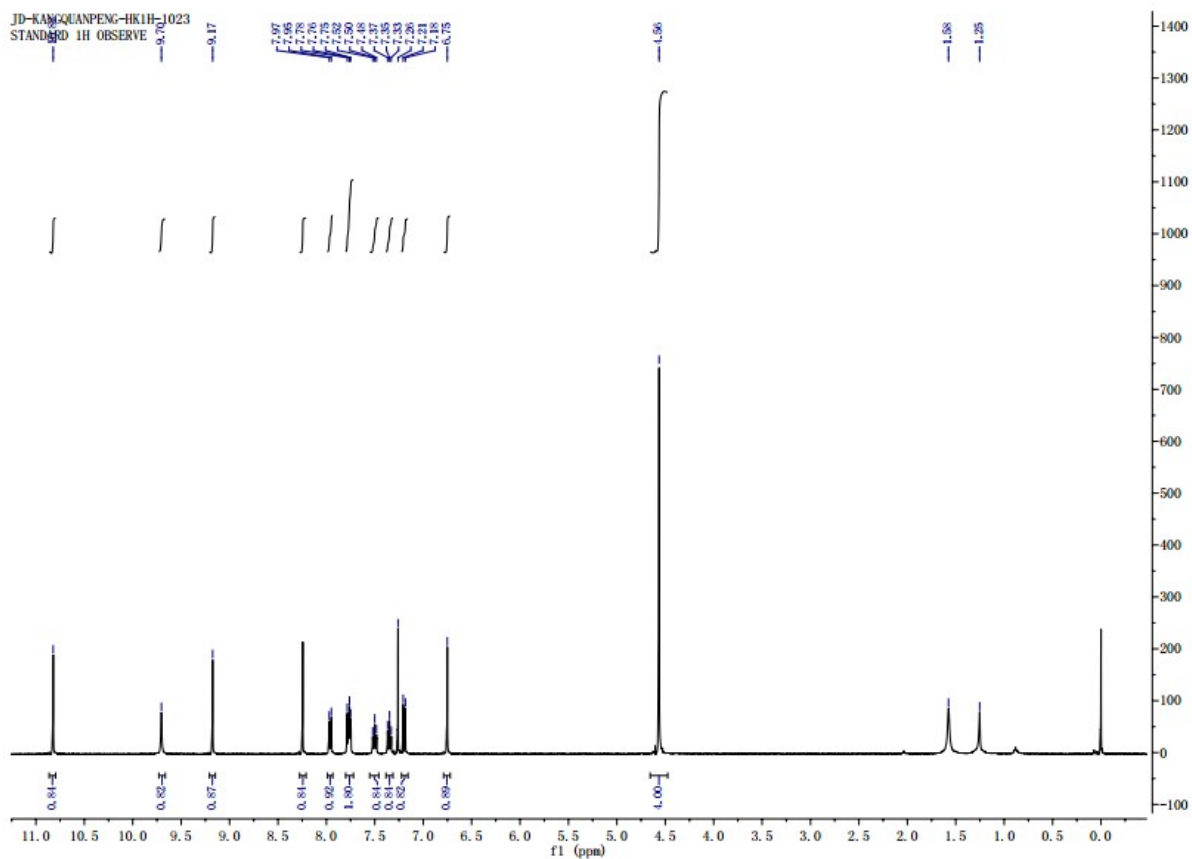

**Fig. S1.** <sup>1</sup>H NMR of the ligand H<sub>4</sub>L.

<sup>a</sup> College of Science, Gansu Agricultural University, Lanzhou, Gansu 730070, PR China E-mail: [pulm@gsau.edu.cn](mailto:pulm@gsau.edu.cn);

<sup>b</sup> College of Chemical and Biological Engineering, Lanzhou Jiaotong University, Lanzhou, Gansu, 730070, P. R. China. E-mail: [dongwk@126.com](mailto:dongwk@126.com).

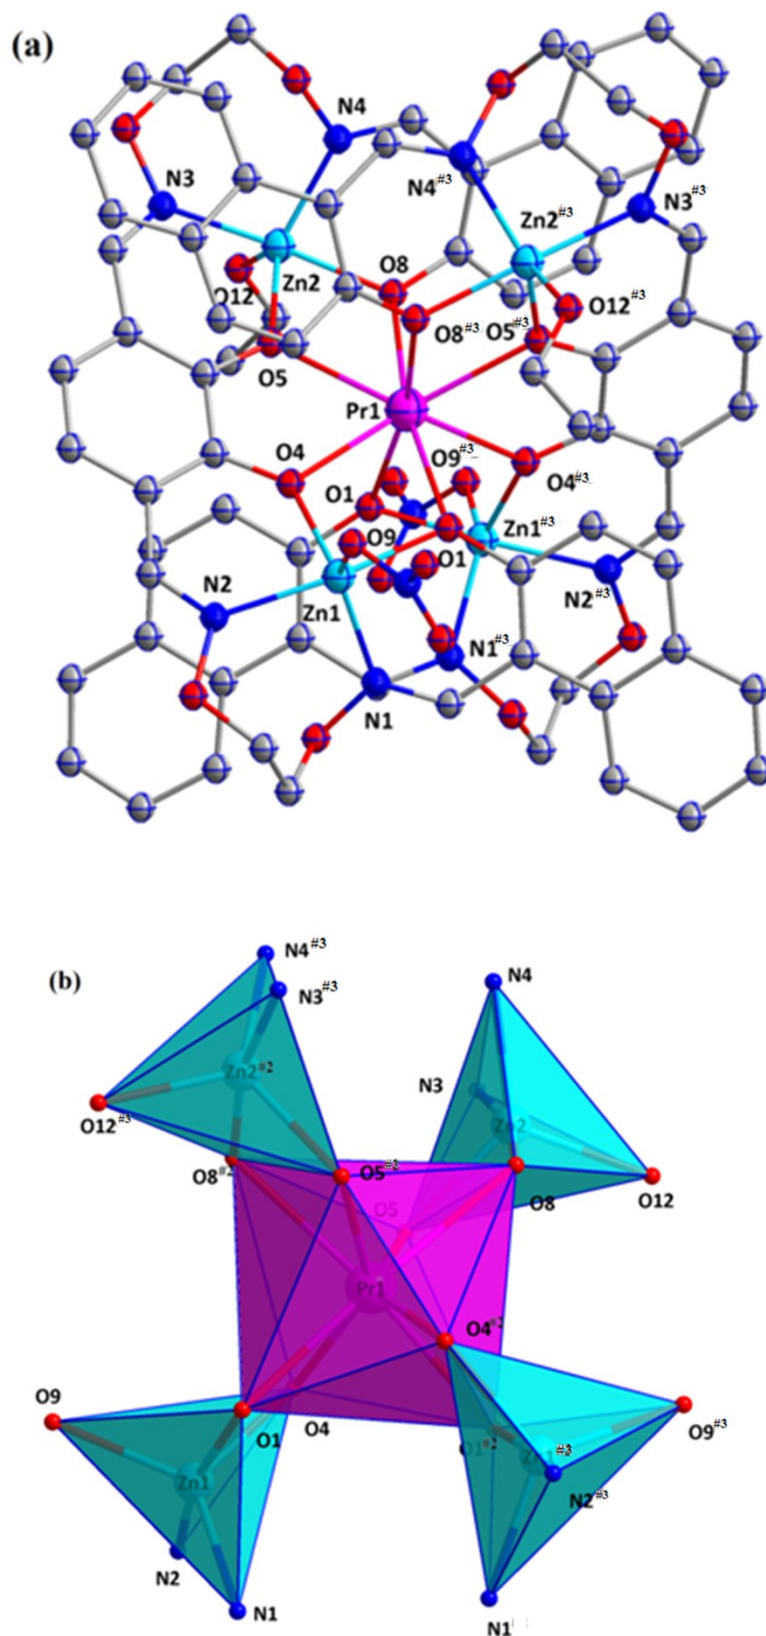

**Fig. S2.** (a) Molecule structure of complex **3** (hydrogen atoms and solvent molecules are omitted for clarity). (b) Coordination polyhedrons for Zn<sup>II</sup> and Pr<sup>III</sup> ions of complex **3** ( $[\text{Zn}_4(\text{L})_2\text{Pr}(\text{NO}_3)_2(\text{OEt})(\text{EtOH})]$ ).

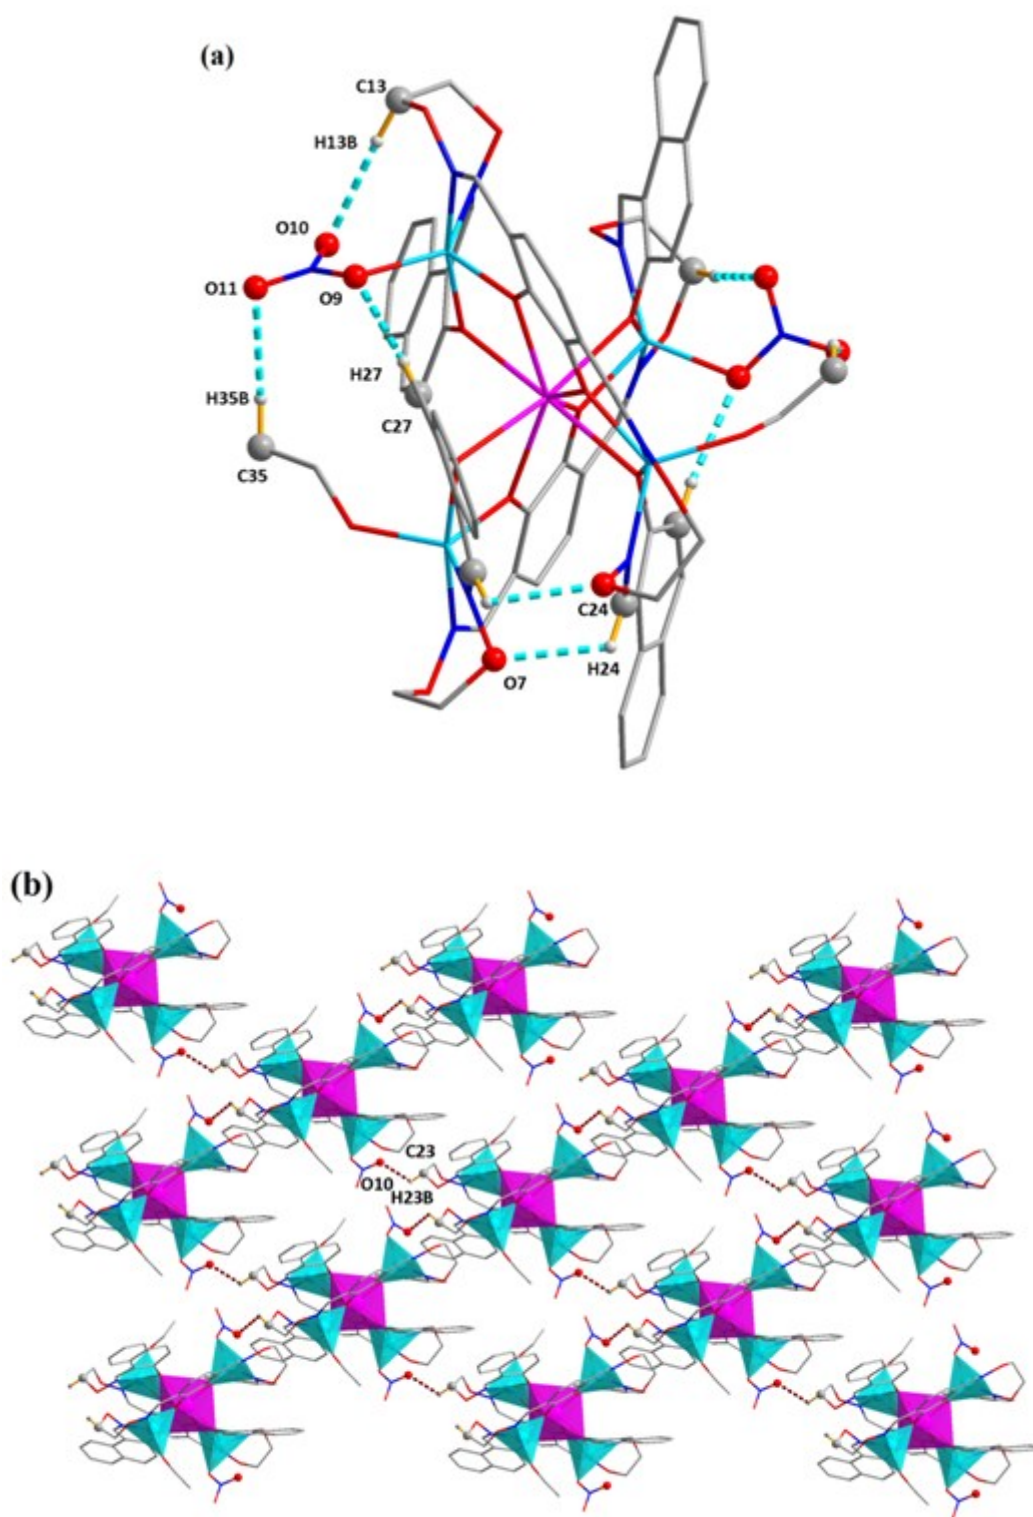

**Fig. S3.** (a) View of the intramolecular hydrogen bonding interactions of complex **3**. (b) View of an infinite 2D supramolecular structure of complex **3** ( $[\text{Zn}_4(\text{L})_2\text{Pr}(\text{NO}_3)_2(\text{OEt})(\text{EtOH})]$ ).

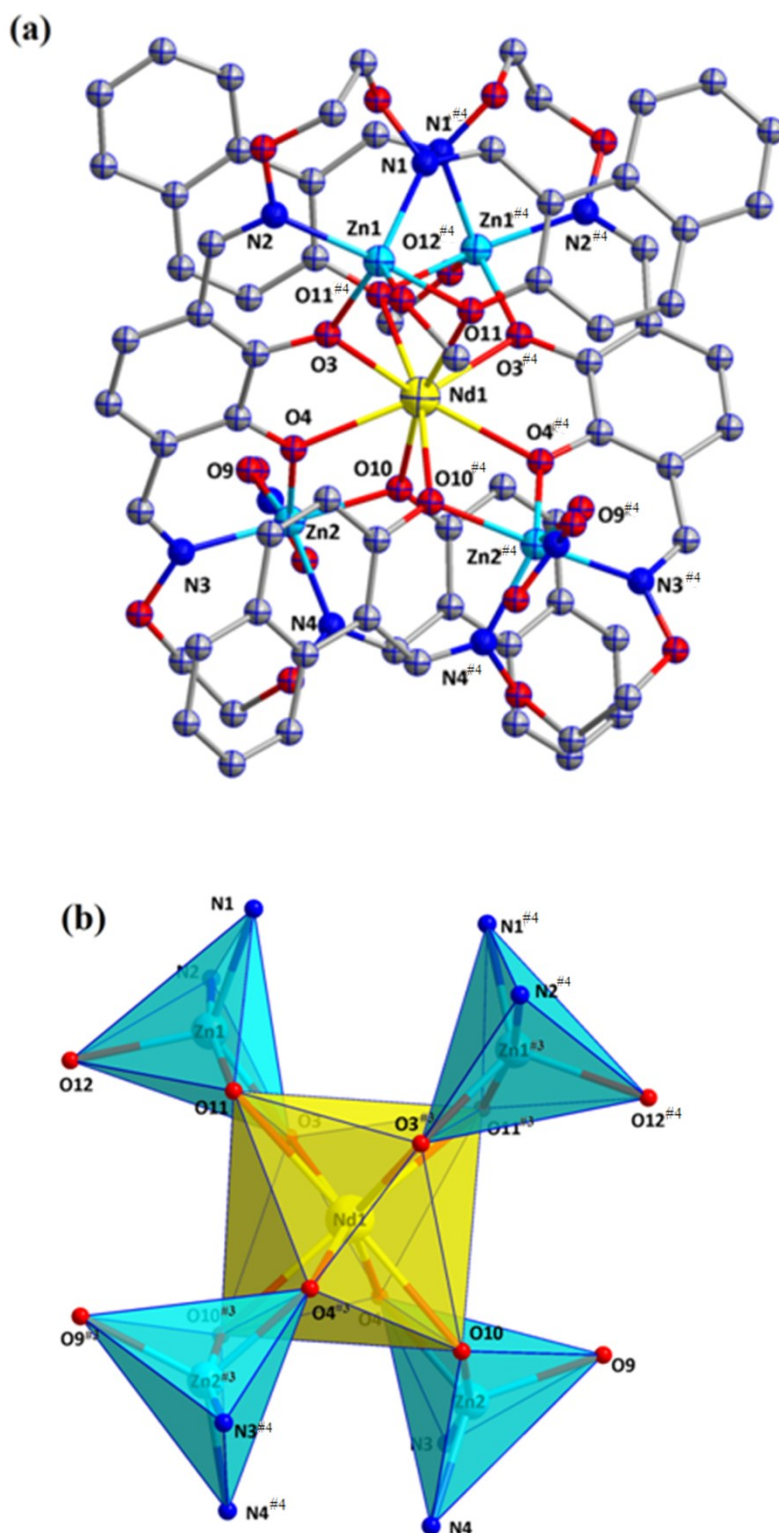

**Fig. S4.** (a) Molecule structure of complex **4** (hydrogen atoms and solvent molecules are omitted for clarity). (b) Coordination polyhedrons for Zn<sup>II</sup> and Nd<sup>III</sup> ions of complex **4** ( $[\text{Zn}_4(\text{L})_2\text{Nd}(\text{NO}_3)_2(\text{OMe})(\text{MeOH})]$ ).

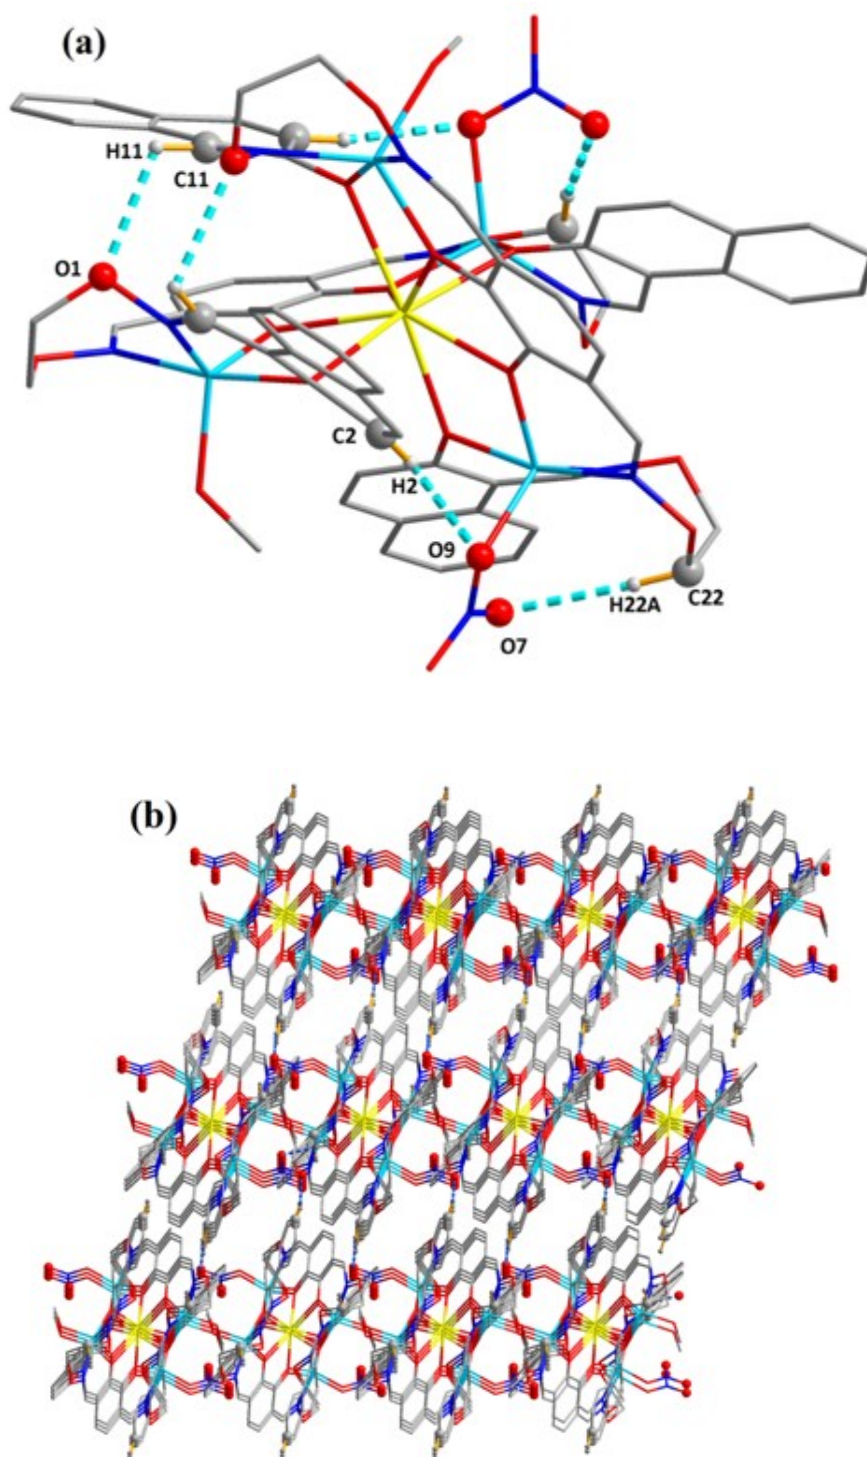

**Fig. S5.** (a) View of the intramolecular hydrogen bonding interactions of complex 4 ( $[\text{Zn}_4(\text{L})_2\text{Nd}(\text{NO}_3)_2(\text{OMe})(\text{MeOH})]$ ). (b) View of an infinite 2D supramolecular structure of complex 4.
